# Supplementary material for: Microfluidically-Assisted Isolation and Characterization of Achromobacter spanius from Soils for Microbial Degradation of Synthetic Polymers and Organic Solvents
Source: MDPI journal article supplement (doi:10.3390/environments9120147), 2022-11-22
Supplement: s1 [file s1]

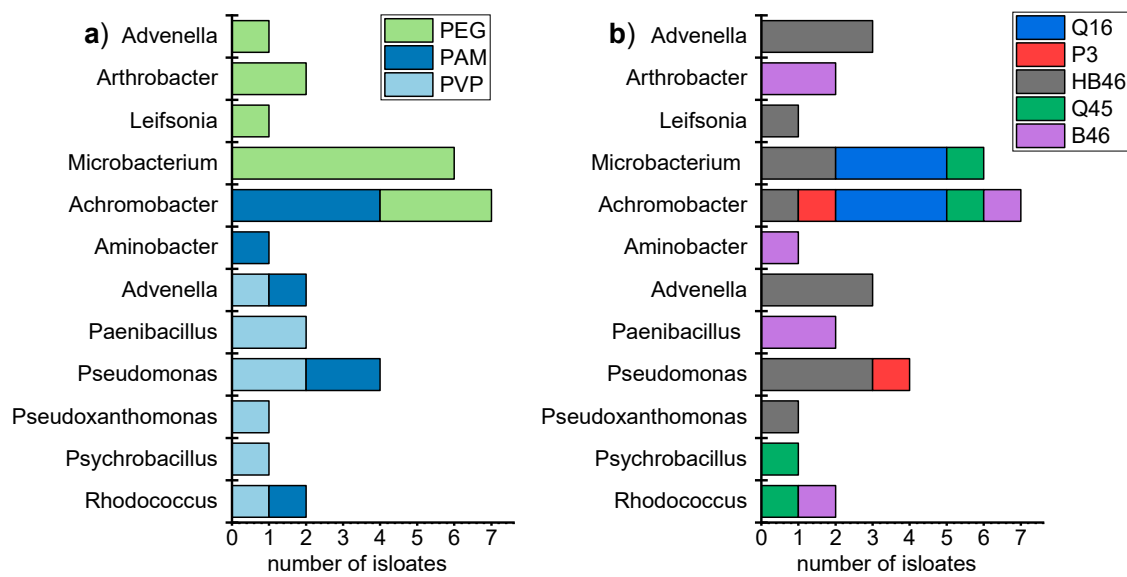

Figure S1: Schematic representation of all 30 isolated strains, which were isolated from five soil samples after being cultured within nanoliter droplets under synthetic polymer stress. a) shows under which polymer the isolates were obtained, b) shows the soil samples from which these strains were isolated.

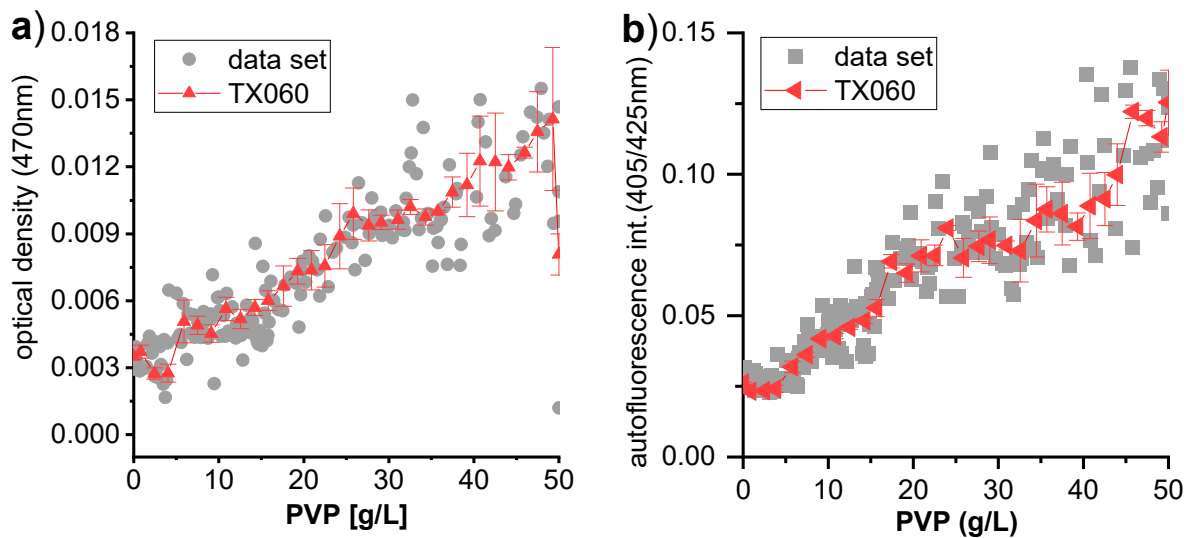

Figure S2: A representative example of how the microdroplet raw data is visualized and treated for each experiment.

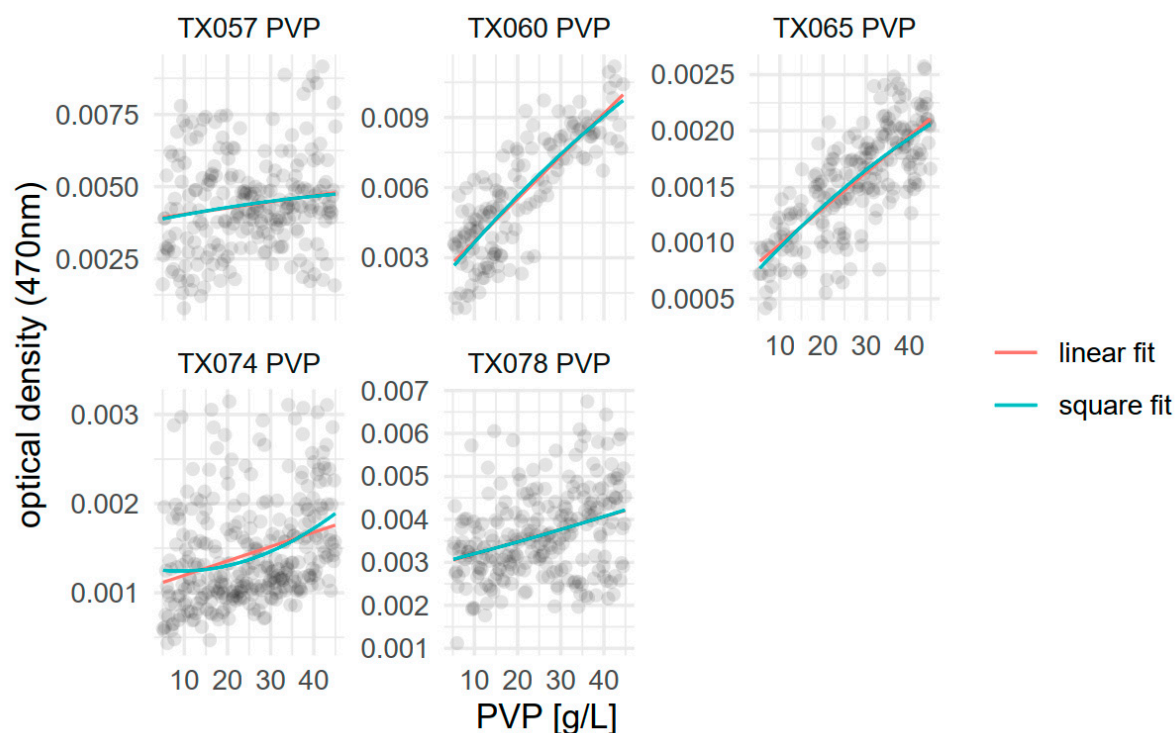

| Name      | term          | estimate | std.error | statistic | p.value  | conf.low  | conf.high |
|-----------|---------------|----------|-----------|-----------|----------|-----------|-----------|
| TX057 PVP | (Intercept)   | 0.00383  | 0.000255  | 15        | 6.41e-35 | 0.00305   | 0.00461   |
| TX057 PVP | concentration | 2.14e-05 | 9.2e-06   | 2.32      | 0.419    | -6.73e-06 | 4.95e-05  |
| TX060 PVP | (Intercept)   | 0.00188  | 0.000237  | 7.93      | 9.02e-12 | 0.00115   | 0.0026    |
| TX060 PVP | concentration | 0.000182 | 9.91e-06  | 18.4      | 4.5e-39  | 0.000152  | 0.000213  |
| TX065 PVP | (Intercept)   | 0.000662 | 5.69e-05  | 11.6      | 2.95e-23 | 0.000488  | 0.000836  |
| TX065 PVP | concentration | 3.22e-05 | 1.92e-06  | 16.8      | 1.35e-39 | 2.63e-05  | 3.8e-05   |
| TX074 PVP | (Intercept)   | 0.00104  | 7.7e-05   | 13.5      | 2e-31    | 0.000801  | 0.00127   |
| TX074 PVP | concentration | 1.61e-05 | 2.78e-06  | 5.79      | 3.47e-07 | 7.62e-06  | 2.45e-05  |
| TX078 PVP | (Intercept)   | 0.00291  | 0.000146  | 19.9      | 9.84e-52 | 0.00246   | 0.00335   |
| TX078 PVP | concentration | 2.89e-05 | 5.25e-06  | 5.51      | 1.84e-06 | 1.29e-05  | 4.49e-05  |

Figure S3: Dose-response raw data curves of isolated *Achromobacter spanius* strains TX057, TX060, TX065, TX074 and TX078 against PVP. Raw data show the optical density of the segments measured by microphotometry. The linear regression fit curve and the estimated values including confidence intervals and p-values.

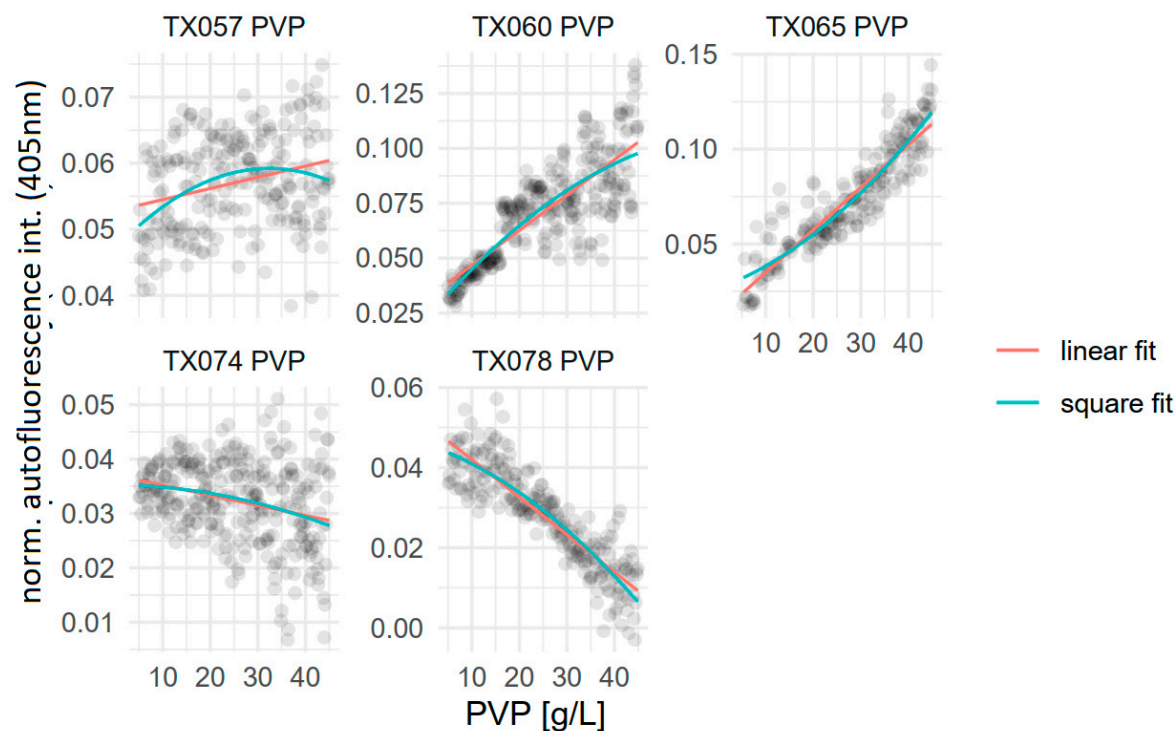

| Name      | term          | estimate  | std.error | statistic | p.value   | conf.low  | conf.high |
|-----------|---------------|-----------|-----------|-----------|-----------|-----------|-----------|
| TX057 PVP | (Intercept)   | 0.0528    | 0.00108   | 48.9      | 1.87e-123 | 0.0495    | 0.0561    |
| TX057 PVP | concentration | 0.000169  | 3.9e-05   | 4.33      | 0.000438  | 4.98e-05  | 0.000288  |
| TX060 PVP | (Intercept)   | 0.0306    | 0.00183   | 16.7      | 1.97e-43  | 0.025     | 0.0361    |
| TX060 PVP | concentration | 0.00161   | 6.63e-05  | 24.2      | 4.66e-71  | 0.0014    | 0.00181   |
| TX065 PVP | (Intercept)   | 0.0125    | 0.00204   | 6.17      | 6.96e-08  | 0.00632   | 0.0188    |
| TX065 PVP | concentration | 0.00224   | 6.85e-05  | 32.7      | 1.04e-83  | 0.00203   | 0.00245   |
| TX074 PVP | (Intercept)   | 0.037     | 0.000993  | 37.3      | 1.34e-114 | 0.034     | 0.0401    |
| TX074 PVP | concentration | -0.000185 | 3.58e-05  | -5.18     | 8.23e-06  | -0.000295 | -7.62e-05 |
| TX078 PVP | (Intercept)   | 0.0514    | 0.000874  | 58.8      | 7.75e-145 | 0.0487    | 0.0541    |
| TX078 PVP | concentration | -0.000938 | 3.14e-05  | -29.9     | 3.47e-82  | -0.00103  | -0.000842 |

Figure S4: Dose-response curves raw data of isolated *Achromobacter spanius* strains TX057, TX060, TX065, TX074 and TX078 against PVP. Raw data show the normalized autofluorescence intensity of the segments measured by microfluorimetry. The linear and square regression fit curve and the estimated values including confidence intervals and p-values.
